# Supplementary material for: Retracted Article: Tuning the chemistry of graphene oxides by a sonochemical approach: application of adsorption properties
Source: Royal Society of Chemistry journal article supplement (doi:10.1039/c5ra02021b), 2015-01-01
Supplement: c5ra02021b1.pdf [file c5ra02021b1.pdf]

**Supporting Information (SI) on**  
**Tuning chemistry of graphene oxides by sonochemical approach:**  
**Application on electrochemistry and adsorption properties**

**SEM images**

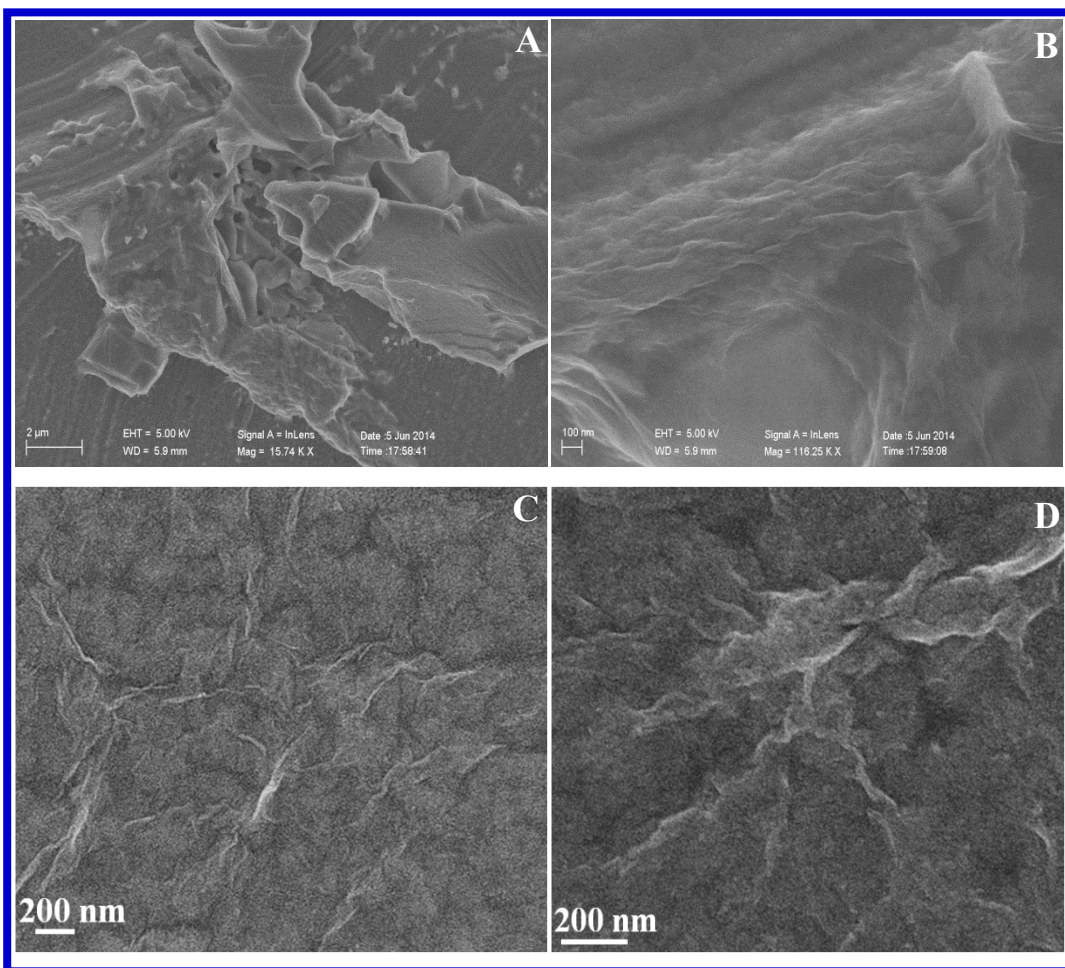

**Figure S1** The SEM images of GO0 (A), GO1 (B), GO2(C) and GO3 (4).

## XPS analysis

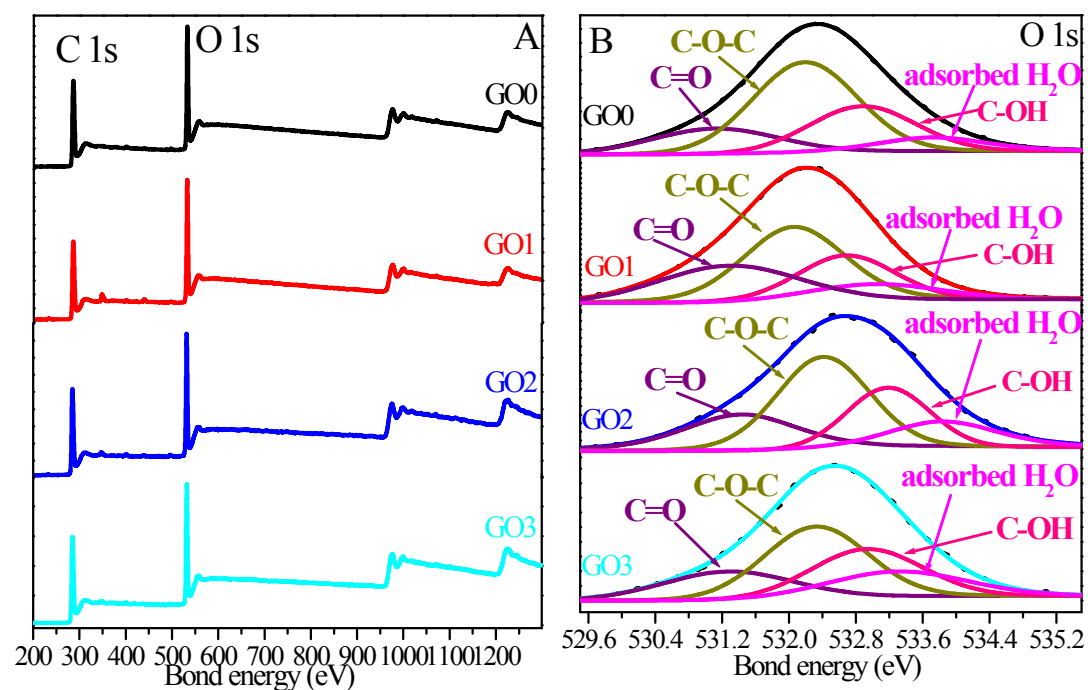

**Figure S2** The XPS spectra of GO0, GO1, GO2 and GO3, A: total scans; B: O 1s spectra.

## XRD patterns

The samples were characterized by powder XRD using a Rigaku powder diffractometer with Cu K $\alpha$  radiation with a step size of 0.02°. Figure S1 compared XRD patterns of GO nanosheets after various ultrasonic time. The maximum of main peak at 12.31 ° moved toward the left with increasing ultrasonic time.

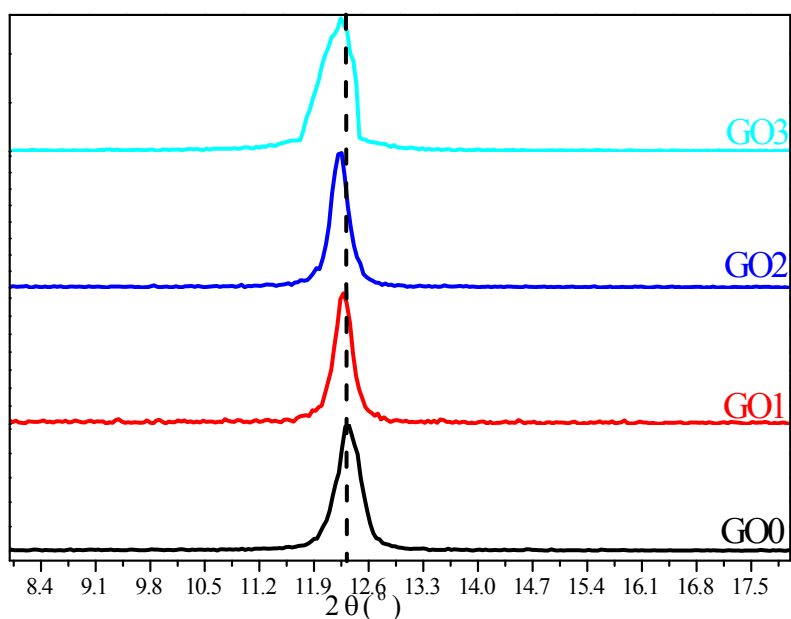

**Figure S3.** The XRD patterns of GO0, GO1, GO2, GO3.

### Langmuir and Freundlich models

**Table S1.** Parameters of adsorption models for U(VI) on GO0, GO1, GO2 and GO3.

| Samples | Langmuir            |                 |        | Freundlich                                       |        |        |
|---------|---------------------|-----------------|--------|--------------------------------------------------|--------|--------|
|         | $q_{max}$<br>(mg/g) | $K_a$<br>(L/mg) | $R^2$  | $Ln K_F$<br>( $mg^{1-1/n}L^{1/n} \cdot g^{-1}$ ) | $1/n$  | $R^2$  |
| GO0     | 102.0408            | 0.0375          | 0.9978 | 2.2673                                           | 0.4817 | 0.9791 |
| GO1     | 126.5823            | 0.0356          | 0.9973 | 2.3816                                           | 0.5003 | 0.9810 |
| GO2     | 136.9863            | 0.0363          | 0.9989 | 2.4208                                           | 0.5163 | 0.9872 |
| GO3     | 151.5152            | 0.0345          | 0.9980 | 2.4331                                           | 0.5327 | 0.9748 |
